# Supplementary material
Source: publisher site journal article supplement (https://neobiota.pensoft.net/article/7015/download/suppl/31/)
Supplement: Supplementary file 1

**Planted forests and invasive alien trees in Europe:**

**A Code for managing existing and future plantings to mitigate the risk of negative impacts from invasions**

Giuseppe Brundu1, David M. Richardson2

**1** *Department of Agriculture, University of Sassari, Viale Italia 39, 07100 Sassari, Italy*

**2** *Centre for Invasion Biology, Department of Botany & Zoology, Stellenbosch University, South Africa*

SUPPLEMENTARY MATERIAL

**Table 1.** Examples of specific plantation practices aimed at reducing problems with invasive alien tree species. Some of these rules can be considered of general utility, whereas others refer to specific alien tree species and aim to mitigate specific impacts.

| **Plantation rule** |
| --- |
| Research findings should be applied to identify the most appropriate sites for cultivation within landscapes. |
| Biodiversity issues must be given explicit consideration in plantation design (e.g., Carnus et al. 2006; COP 11 Decision XI/19 8 - 19 October 2012 - Hyderabad, India). |
| Avoid converting natural habitats for cultivation (FAO 2010c). |
| Restrict plantings to areas where alien tree species are already present. |
| Limit the total allowable area of planting, aggregate planting sites, and reduce the total boundary length. |
| Save or plant 2-3 rows of native and/or less invasive alien tree species around external boundaries or along margins of unplanted reserve areas inside plantations. |
| Design plantation shape to minimise edges at right angles to prevailing winds during seed release season. |
| Whenever possible, include sites with boundaries from where spread is difficult or acceptable (e.g., grazed areas, actively managed production forest, wide roads). |
| Prevent plantings at sites most favourable for long-distance dispersal of seed or pollen (hill tops, ridges, rivers). |
| Minimize soil movement, transport and disturbance in or around planted areas. |
| Whenever possible, use mixed-species plantations (Brockerhoff et al. 2008) and encourage structural diversity through different age classes (Evans 2009b). |
| Encourage the establishment of representative natural forest within the plantation estate and, where possible, restore natural forests on appropriate sites (Secretariat of the Convention on Biological Diversity 2009). |
| Prevent plantings and minimize disturbance near wetlands, rivers and streams and create buffer zones. |
| Prevent plantings near Natura 2000 sites and other protected areas or endangered habitats. |
| Stabilise disturbed soils as soon as possible. |

**Table 2**. The fifty alien trees most frequently listed (with different rankings) in European countries (DK = Denmark, BL = Belgium, IT = Italy, IR = Ireland, NW = Norway, PT = Portugal, SW = Sweden, EPPO = EPPO Region). The table includes both tree species alien “to” and alien “in” Europe or in the EPPO region.

| **Species** | **DK** | **BL** | | **IT** | | **IR** | | **Malta** | | **NW** | | **PT** | **SW** | | | | **EPPO** |
| --- | --- | --- | --- | --- | --- | --- | --- | --- | --- | --- | --- | --- | --- | --- | --- | --- | --- |
| *Abies alba* Mill. |  |  | |  | |  | |  | | HI | |  |  | | Invasive | | |
| *Abies balsamea* (L.) Mill. |  |  | |  | |  | |  | | LO | |  |  | |  | | |
| *Abies concolor* (Gordon) Lindl. ex Hildebr. |  |  | |  | |  | |  | | PH | |  |  | |  | | |
| *Abies grandis* (Douglas ex D.Don) Lindl. |  |  | |  | |  | |  | | PH | |  |  | |  | | |
| *Abies koreana* E.H.Wilson |  |  | |  | |  | |  | | LO | |  |  | |  | | |
| *Abies lasiocarpa* (Hook.) Nutt. |  |  | |  | |  | |  | | LO | |  |  | |  | | |
| *Abies mariesii* Mast. |  |  | |  | |  | |  | | NK | |  |  | |  | | |
| *Abies nordmanniana* (Steven) Spach |  |  | |  | |  | |  | |  | |  |  | |  | | |
| *Abies pinsapo* Boiss. |  |  | |  | |  | |  | |  | |  |  | |  | | |
| *Abies procera* Rehder |  |  | |  | |  | |  | | LO | |  |  | |  | | |
| *Abies sibirica* Ledeb. |  |  | |  | |  | |  | | PH | |  |  | |  | | |
| *Acacia cyclops* G.Don |  |  | |  | |  | | MPI | |  | |  |  | |  | | |
| *Acacia dealbata* Link |  |  | |  | | Potential | |  | |  | | Annex I | Watch-List | | Invasive | | |
| *Acacia decurrens* Willd. |  |  | |  | |  | |  | |  | |  |  | |  | | |
| *Acacia farnesiana* (L.) Willd. |  |  | |  | |  | |  | |  | | Annex I-III |  | |  | | |
| *Acacia karroo* Hayne |  |  | |  | |  | | MPI | |  | | Annex I |  | |  | | |
| *Acacia longifolia* (Andrews) Willd. |  |  | |  | |  | |  | |  | | Annex I |  | |  | | |
| *Acacia mearnsii* De Wild. |  |  | |  | |  | |  | |  | | Annex I |  | |  | | |
| *Acacia melanoxylon* R.Br. |  |  | |  | | Potential | |  | |  | | Annex I |  | |  | | |
| *Acacia pycnantha* Benth. |  |  | |  | |  | |  | |  | | Annex I |  | |  | | |
| *Acacia retinodes* Schltdl. |  |  | |  | |  | |  | |  | | Annex I |  | |  | | |
| *Acacia saligna* (Labill.) Wendl. |  |  | |  | |  | | MPI | |  | | Annex I |  | |  | | |
| *Acer campestre* L. |  |  | |  | |  | |  | | LO | |  |  | |  | | |
| *Acer negundo* L. |  | WL B2 | | Black-List | |  | |  | | LO | |  |  | |  | | |
| *Acer platanoides* L. |  |  | |  | | Uncertain | |  | |  | |  |  | |  | | |
| *Acer pseudoplatanus* L. |  |  | |  | | Amber-List | |  | | SE | |  |  | |  | | |
| *Aesculus hippocastanum* L. |  |  | |  | |  | |  | | PH | |  |  | |  | | |
| *Ailanthus altissima* (Mill.) Swingle |  | BL A2 | | Black-List | | Uncertain | | MPI | |  | | Annex I | Black-List | | Invasive | | |
| *Broussonetia papyrifera* (L.) L'Hér. ex Vent. |  |  | | Black-List | |  | |  | |  | |  |  | |  | | |
| *Casuarina equisetifolia* L. |  |  | |  | |  | | MPI | |  | |  |  | |  | | |
| *Chamaecyparis lawsoniana* (A.Murray bis) Parl. |  |  | |  | |  | |  | | LO | |  |  | |  | | |
| *Eucalyptus camaldulensis* Dehnh. |  |  |  | |  | | MPI | |  | |  | | |  | |  | |
| *Larix decidua* Mill. |  |  |  | |  | | |  | SE | |  | | |  | |  | |
| *Paulownia tomentosa* Steud. |  |  | Black-List | | Potential | | |  |  | |  | | | Watch-List | |  | |
| *Picea sitchensis* (Bong.) Carrière |  |  |  | | Uncertain | | |  | SE | |  | | |  | |  | |
| *Pinus contorta* Douglas ex Loudon | Black-List |  |  | | Uncertain | | |  | PH | |  | | |  | |  | |
| *Pinus contorta* var*. latifolia* Engelm*.* | Black-List |  |  | |  | | |  |  | |  | | |  | |  | |
| *Pinus contorta* var*. murrayana* (Balf.) S.Watson | Black-List |  |  | |  | | |  |  | |  | | |  | |  | |
| *Pinus mugo* Turra | Black-List |  |  | |  | | |  | SE | |  | | |  | |  | |
| *Pinus mugo Turra* subsp*. rotundata* (Link ) A.E.Murray | Black-List |  |  | |  | | |  |  | |  | | |  | |  | |
| *Pinus nigra* J.F.Arnold |  |  | Black-List | |  | | |  | LO | |  | | |  | |  | |
| *Populus alba* L. |  |  |  | |  | | |  | LO | |  | | |  | |  | |
| *Prunus laurocerasus* L. |  | WL B1 | Black-List | |  | | |  |  | |  | | | Black-List | |  | |
| *Prunus serotina* Ehrh. | Black-List | BL A3 | Black-List | |  | | |  | HI | |  | | | Black-List | | Invasive | |
| *Pseudotsuga menziesii* (Mirb.) Franco |  |  |  | | Uncertain | | |  | LO | |  | | |  | |  | |
| *Quercus cerris* L. |  |  |  | | Uncertain | | |  | LO | |  | | |  | |  | |
| *Quercus rubra* L. |  | WL B3 | Black-List | | Uncertain | | |  | LO | |  | | |  | |  | |
| *Robinia pseudoacacia* L. | Obs-List | WL B3 | Black-List | | Uncertain | | |  | HI | | Annex I | | | Black-List | |  | |
| *Salix viminalis* L. |  |  |  | | Uncertain | | |  | PH | |  | | |  | |  | |
| *Thuja plicata* Donn ex D.Don |  |  |  | |  | | |  | LO | |  | | |  | |  | |
